# Supplementary material
Source: publisher figshare collection journal article supplement (https://aacr.figshare.com/articles/dataset/_/22428165)
Supplement: Supplementary file 1 [file 39874497]

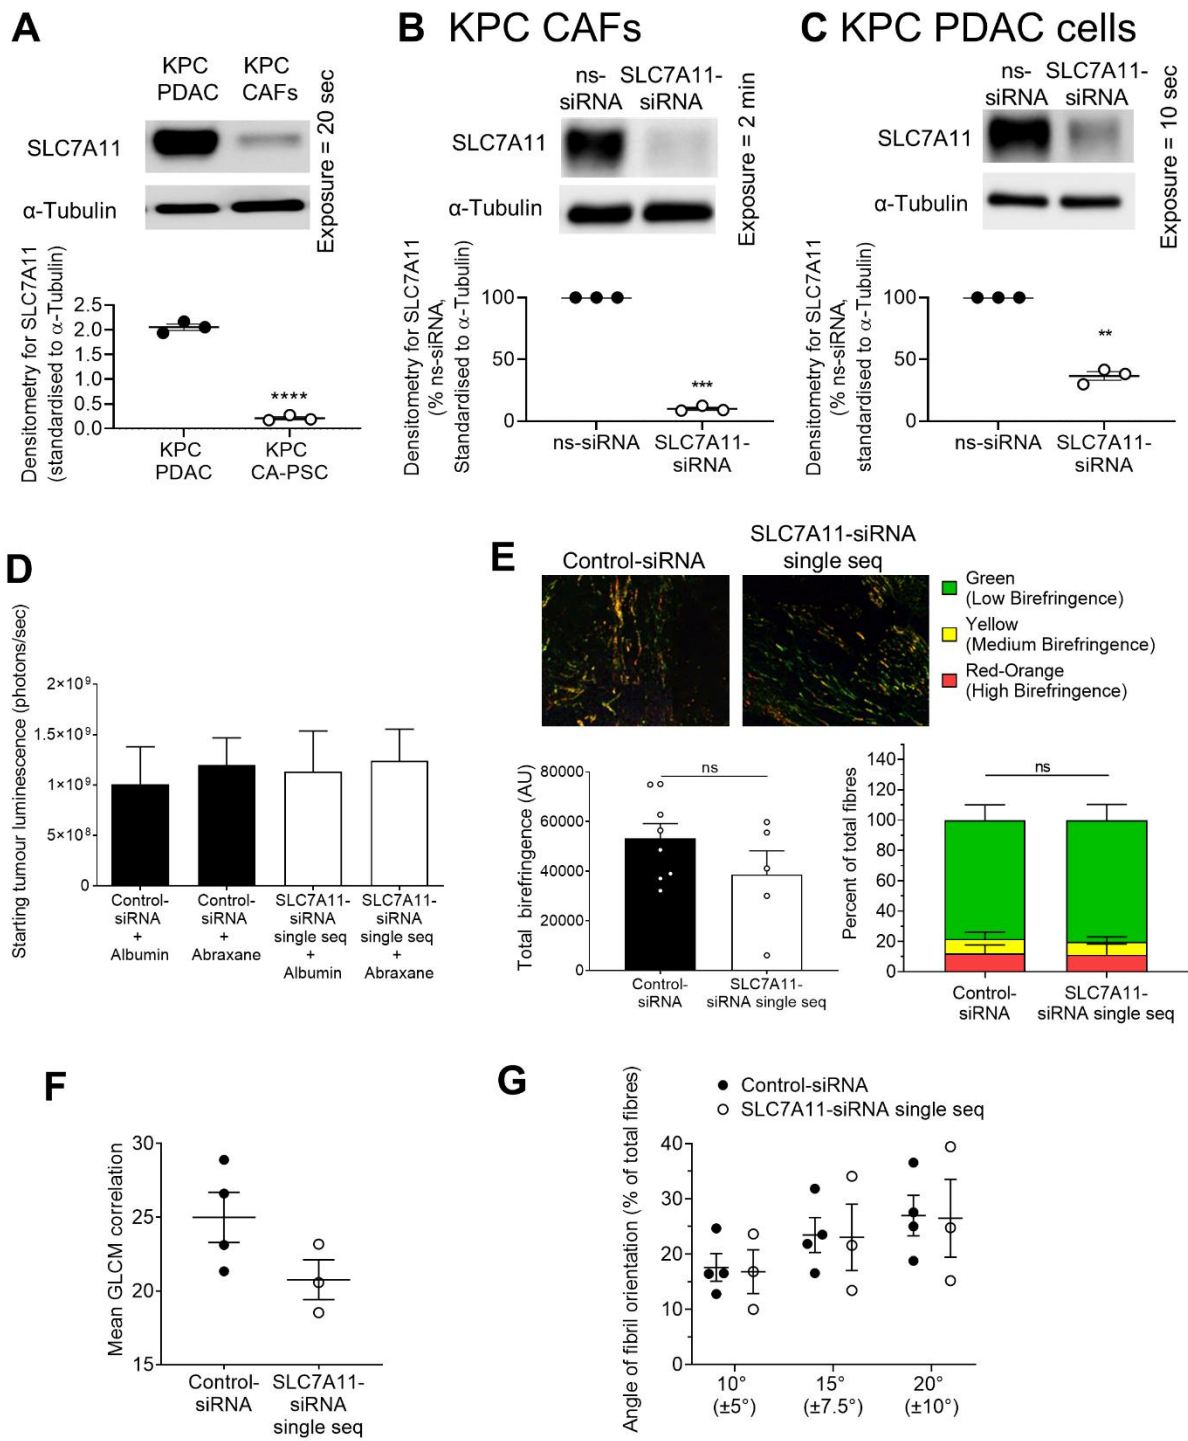

**Figure S4**

**Figure S4: Confirmation of SLC7A11 knockdown in KPC tumour cells and CAFs and collagen fibril analysis in tumour sections at therapeutic model endpoint.** A) Western blot comparing SLC7A11 in KPC PDAC cells and KPC CAFs. B) Western blot and densitometry for SLC7A11 knockdown in KPC CAFs (standardised to  $\alpha$ -tubulin). C) As per B, expect KPC PDAC cell extracts were used. Exposure times for luminescence acquisition are shown next to each blot. Circles in B-C indicate replicate experiments (n=3), lines = mean $\pm$ s.e.m. Student t-test used for (A-C). Asterisks in all graphs indicate significance (\*\*p $\leq$ 0.01, \*\*\*p $\leq$ 0.001, \*\*\*\*p $\leq$ 0.0001). D) Graph shows mean tumour luminescence (+s.e.m.) post-randomisation for therapeutic model of SLC7A11 knockdown (n=7-8 per group). Groups were not significantly different by one-way ANOVA. E) Polarised light analysis of representative regions from picosirius red stained specimens. Representative photos are shown. Left bar graph shows total birefringence (mean+s.e.m.; Control-siRNA, n=8; SLC7A11-siRNA single seq, n=5). Right bar graph shows the average frequency (mean+s.e.m.; Control-siRNA, n=8; SLC7A11-siRNA single seq, n=5) of low, medium and high birefringence collagen fibrils (higher birefringence = denser fibril). ns = not significant (student t-test). Collagen was detected by second harmonics generation and the maximum intensity projections of 3 representative regions were used per tumour section. F) Grey-level co-occurrence matrix (GLCM) analysis. Graph shows mean correlation per group. Circles indicate individual mice (n=3-4), lines indicate mean $\pm$ s.e.m. G) Graph shows the % of total fibrils with angles of  $\pm 10^\circ$ ,  $15^\circ$  and  $20^\circ$  deflection from the centre axis. Circles indicate individual mice (n=3-4), lines indicate mean $\pm$ s.e.m. Student t-test used for (E-F), one-way ANOVA used for (G). Groups were not significantly different.
